# Supplementary material for: The Experience of Robot-assisted Laparoscopic Transabdominal Preperitoneal Inguinal Hernia Repair Following Robot-assisted Laparoscopic Radical Prostatectomy: A Cohort Study
Source: Research Square preprint supplement (doi:10.21203/rs.3.rs-1274816/v1), 2022-01-24
Supplement: Supplementary file 1 [file 8c7a90733e166a52572213c4.xlsx]

## Sheet: Table 2
Table 2 Surgical outcomes
Characteristics	PIH group (N = 16)	Non-PIH group (N = 54)	P-value
Time of operation (min)	180.4 (123–306)	123.2 (51–205)	0.001
Estimated blood loss (mL)	5.2 (0–25)	3.7 (0–20)	0.28
Conversion late (%)	0 (0.0%)	0 (0.0%)	N.A
Postoperative hospital stay (day)	1	1	N.A
Postoperative complications (%)	0 (0%)	1 (1.9%)	0.58
Recurrence (%)	0 (0%)	0 (0%)	N.A
PIH: Postprostatectomy inguinal hernia, N.A: Not applicable
