# Supplementary material for: The Experience of Robot-assisted Laparoscopic Transabdominal Preperitoneal Inguinal Hernia Repair Following Robot-assisted Laparoscopic Radical Prostatectomy: A Cohort Study
Source: Research Square preprint supplement (doi:10.21203/rs.3.rs-1274816/v1), 2022-01-24
Supplement: Supplementary file 2 [file 8dae50fde351f49f638c5c92.xlsx]

## Sheet: Table 1
Table 1 Patient background
Characteristics	PIH group (N = 16)	Non-PIH group (N = 57)	P-value
Age (years, range)	68.1 (61–80)	67.5 (36–85)	0.85
ASA
1 or 2	16	56	0.58
3	0	1
BMI (kg/m2, SEM)	22.4 ± 0.5	23.1 ± 0.4	0.41
Total number of inguinal hernia	22	67	N.A
Time to recurrence after RALP	10 (1–31)	N.A	N.A
(month, range)
PIH: Postprostatectomy inguinal hernia, BMI: Body mass index, ASA: American society of anesthesiologists, SEM: Standard error of the mean, N.A: Not applicable.
